# Supplementary material for: High Diversity of the Fungal Community Structure in Naturally-Occurring Ophiocordyceps sinensis
Source: PLoS One. 2010 Dec 15;5(12):e15570. doi: 10.1371/journal.pone.0015570 (PMC3002287; doi:10.1371/journal.pone.0015570)
Supplement: Table S1 — Estimates of diversity indices from the culture-dependent and -independent investigations. * Singletons are those OTUs that occur only once within the total data set of fungal cultures or clones. (XLS) [file pone.0015570.s003.xls]

## Sheet: Sheet4
Investigation	No. of strains/clones	No. of OTUs	Percentage of singletons (%) *	Ma	H'	J
Culture-dependent	572	92	42.3913	14.3327	3.49	0.772
Culture-independent	490	118	59.3	18.888	3.45	0.723
